# Supplementary material
Source: publisher figshare collection journal article supplement (https://springernature.figshare.com/ndownloader/files/40128109)
Supplement: Supplementary file [file 40128109]

## Mortality in farmed European eel (*Anguilla anguilla*) in Italy due to *Streptococcus iniae*

Teresa Pirollo, Alberto Perolo, Simone Mantegari, Ilaria Barbieri, Federico Scali, Giovanni Loris Alborali, Cristian Salogni

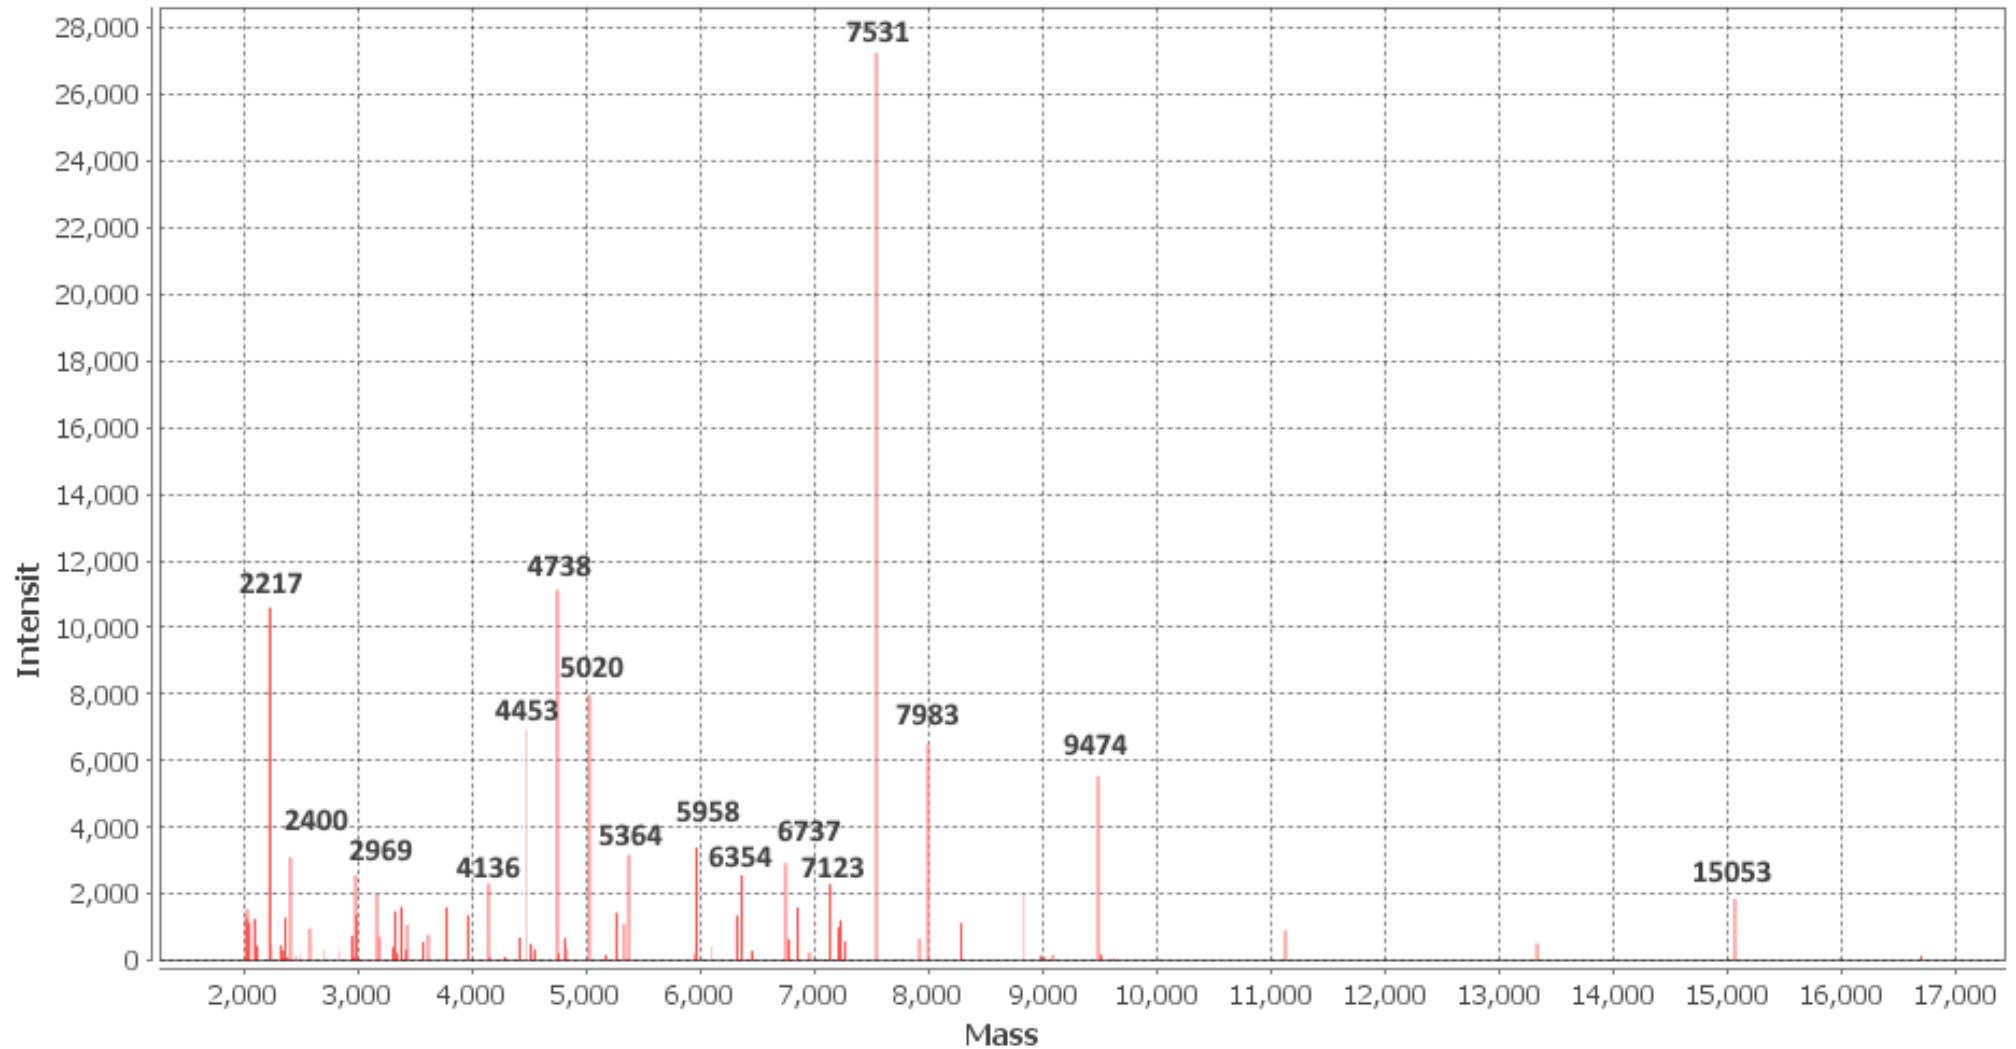

**Additional File 1.** Main spectrum profiles (MSPs) of the *Streptococcus iniae* isolate showing intensity (Y-axis) as a function of the mass-to-charge ratio (m/z, molecular weight for a single positive charge; X-axis). Peaks with intensities greater than 2000 are labelled.
